# Supplementary material for: Enhancement of the ionic conductivity of lithium borohydride by silica supports
Source: Royal Society of Chemistry journal article supplement (doi:10.1039/d1dt02864b), 2021-01-01
Supplement: d1dt02864b1.pdf [file d1dt02864b1.pdf]

## Supplementary Material

# Revealing the Support Effect on Enhancing Lithium Borohydride Ionic Conductors

Guoyu Yang<sup>a,#</sup>, Chen Xie<sup>a,#</sup>, Yongtao Li<sup>a,\*</sup>, Hai-Wen Li<sup>b</sup>, Dongming Liu<sup>a,\*</sup>, Jianguo Chen<sup>c,\*</sup>, Qingan  
Zhang<sup>a</sup>

<sup>a</sup>School of Materials Science and Engineering, Anhui University of Technology, Maanshan 243002,  
China

<sup>b</sup>Hefei General Machinery Research Institute, Hefei 230031, China

<sup>c</sup>School of Materials Science and Engineering, Shanghai University, Shanghai, China.

| Performance                      | 30%<br>LiBH <sub>4</sub> /SM | 50%<br>LiBH <sub>4</sub> /SM | 70%<br>LiBH <sub>4</sub> /SM | 47%<br>LiBH <sub>4</sub> /SM | 47%<br>LiBH <sub>4</sub> /MSN | 47%<br>LiBH <sub>4</sub> /SBA-15 |
|----------------------------------|------------------------------|------------------------------|------------------------------|------------------------------|-------------------------------|----------------------------------|
| Impedance/ $\Omega$              | $5 \times 10^5$              | $3 \times 10^5$              | $6 \times 10^5$              | $2.6 \times 10^5$            | $1.2 \times 10^5$             | 1617                             |
| Conductivity/ $S\text{ cm}^{-1}$ | $8.9 \times 10^{-8}$         | $1.5 \times 10^{-7}$         | $8.6 \times 10^{-8}$         | $2 \times 10^{-7}$           | $7.5 \times 10^{-7}$          | $2.9 \times 10^{-5}$             |

**Table S1.** Resistance and ionic conductivity of different LiBH<sub>4</sub>/SiO<sub>2</sub> composites at 35 °C

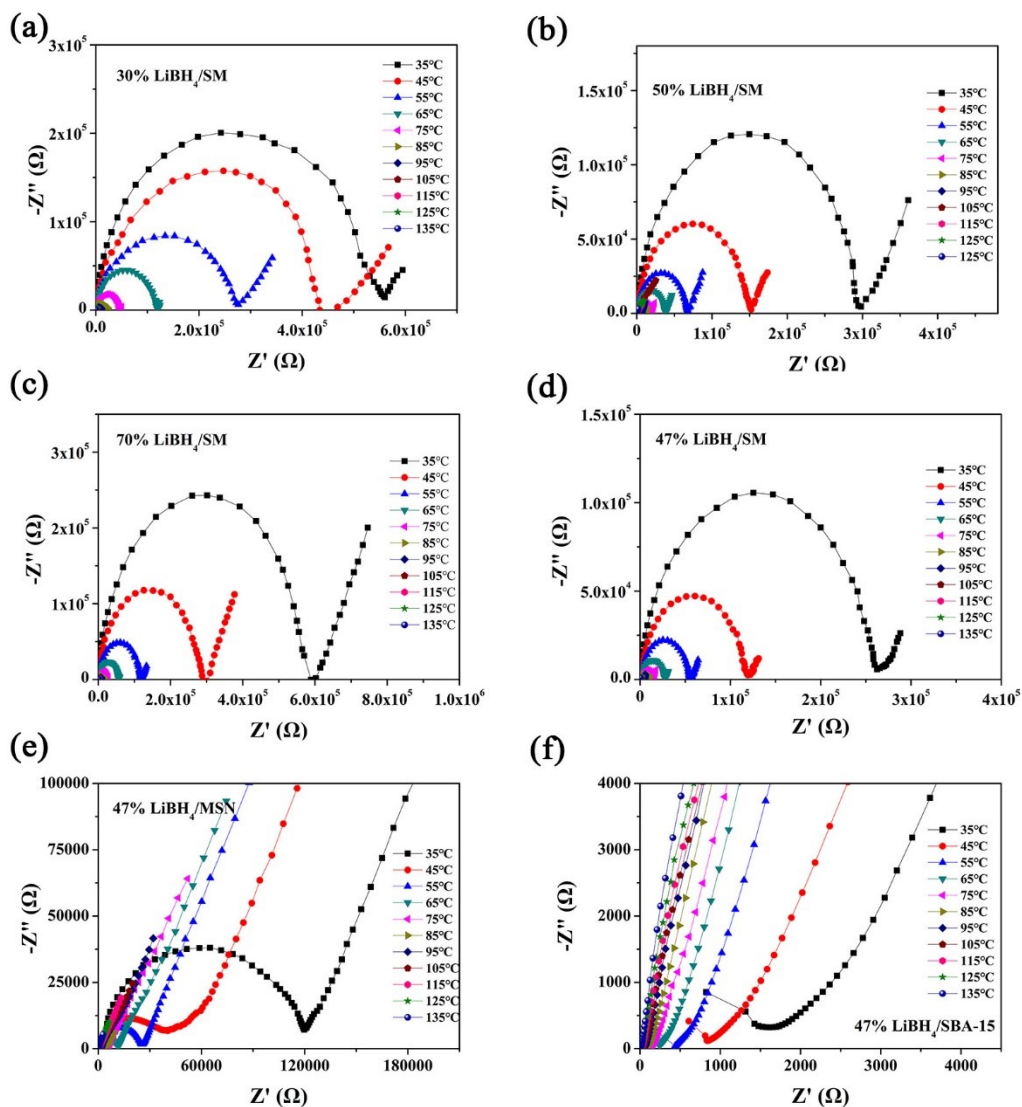

**Figure S1.** Electrochemical impedance spectroscopy of LiBH<sub>4</sub>/SiO<sub>2</sub> composites

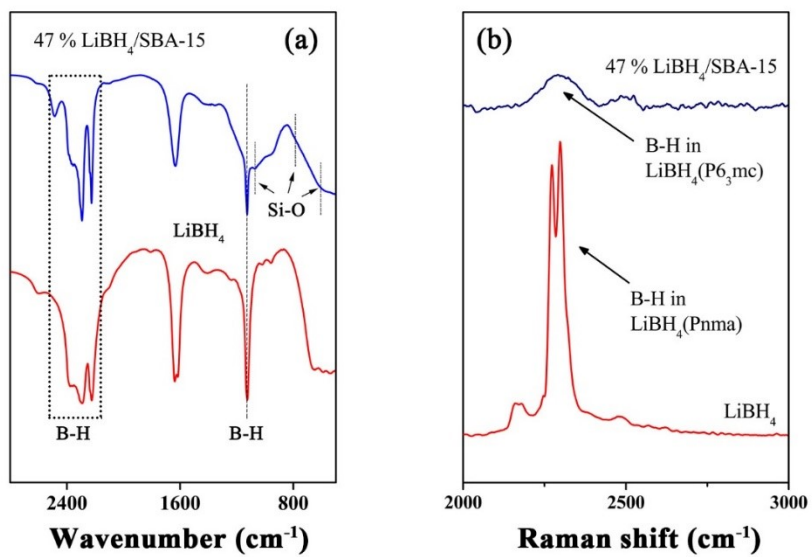

**Figure S2.** FTIR and Raman curves for the pristine LiBH<sub>4</sub> and 47% LiBH<sub>4</sub>/SBA-15.

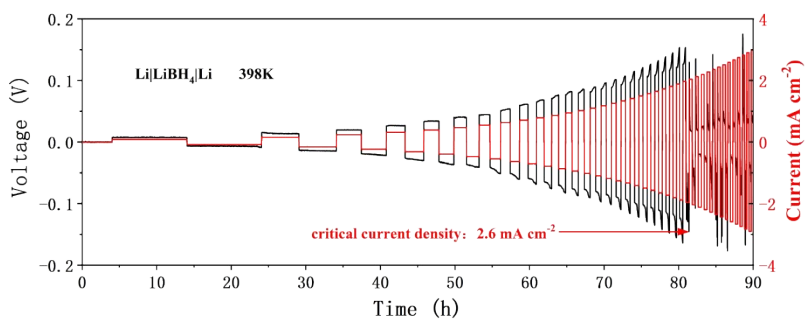

**Figure S3.** The critical current density curves of pristine LiBH<sub>4</sub>.
